# Supplementary material
Source: PubMed Central journal article supplement (PMC7335732)
Supplement: NIHMS1571832-supplement-ESM.pdf [file NIHMS1571832-supplement-ESM.pdf]

**Supplemental information**

**Males with a mother living in their community have higher paternity success in bonobos but not chimpanzees**

Martin Surbeck, Christophe Boesch, Catherine Crockford, Melissa Emery Thompson, Takeshi Furuichi, Barbara Fruth, Gottfried Hohmann, Shintaro Ishizuka, Zarin Machanda, Martin N. Muller, Anne Pusey, Tetsuya Sakamaki, Nahoko Tokuyama, Kara Walker, Richard Wrangham, Emily Wroblewski, Klaus Zuberbühler, Linda Vigilant and Kevin Langergraber

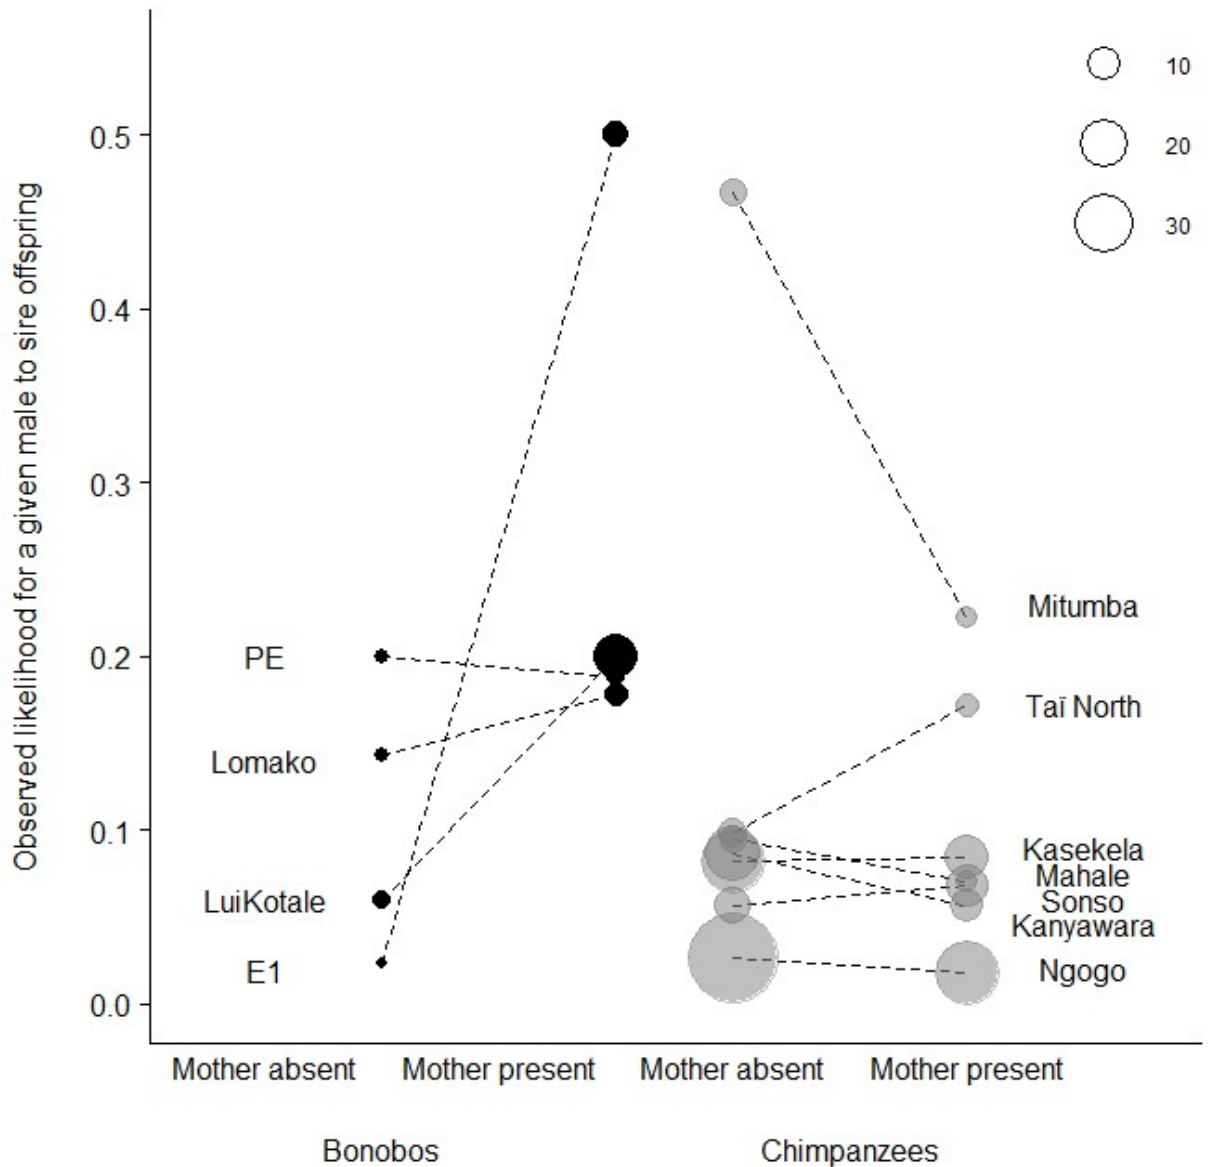

**Figure S1. Average likelihood of a male to sire offspring in the presence and absence of their mothers in chimpanzees and bonobo communities.**

Bonobos are represented in black and chimpanzees in grey. Circle sizes represent the number of offspring.

| Species     | Community (Location) | Reference to published data | Number offspring | Percentage of offspring sired in the presence of the sire's mother |
|-------------|----------------------|-----------------------------|------------------|--------------------------------------------------------------------|
| Bonobo      | Bompusa (LuiKotale)  | [S1]                        | 20               | 85%                                                                |
| Bonobo      | Eyengo (Lomako)      | [S2]                        | 7                | 71%                                                                |
| Bonobo      | E1 (Wamba)           | [S3]                        | 7                | 86%                                                                |
| Bonobo      | PE (Wamba)           | [S3]                        | 5                | 60%                                                                |
| Chimpanzees | North group (Tai)    | [S4]                        | 13               | 38%                                                                |
| Chimpanzees | M group (Mahale)     | [S5S,6]                     | 11               | 36%                                                                |
| Chimpanzees | Kasekela (Gombe)     | [S7,S8]                     | 53               | 32%                                                                |
| Chimpanzees | Mitumba (Gombe)      | [S8]                        | 11               | 36%                                                                |
| Chimpanzees | Ngogo (Kibale)       | [S1,S9]                     | 109              | 33%                                                                |
| Chimpanzees | Kanyawara (Kibale)   |                             | 38               | 26%                                                                |
| Chimpanzees | Sonso (Budongo)      | [S10,S11]                   | 28               | 57%                                                                |

**Table S1. Overview over included published data, sample size and percentage of sire's mothers present during conceptions.**

## Supplemental Experimental Procedures

### *Study sites*

We combined genetic and demographic data from four bonobo and six chimpanzee communities (Table S1).

### *Data preparation*

The conception date was estimated by subtracting 230 days, the mean gestation length in captive bonobos and chimpanzees ([S12,S13]), from the offspring's estimated birthdate. In the bonobo communities some conceptions occurred up to four years before the exact community composition was known (Eyengo, 6 of 7 infants with a single possible father [S2]; Bompusa, 7 of 20 infants with known within-group sire). For these cases, we assumed that the males and females identified when the community composition was first established were also present during these earlier conceptions. This assumption may have misclassified some males as having no mother living in the community at the time of a conception if their mothers died before they were individually identified. However, such misclassification is unlikely, as mothers with adult sons are older females, who are typically among the first individuals to be identified during the habituation process due to their central positions in bonobo society and distinctive physical appearances.

### *Statistical analysis*

We used a Generalized Linear Mixed Model with a binomial error structure and logit link function [S14] to determine how the effect of having a mother living in the community at the time of a conception affected a male's probability of siring an offspring in bonobos compared to chimpanzees. For each offspring, we determined the males who were present in the group and of reproductive age ( $\geq 10$  years) at the time of conception, and set the identity of the sire (yes/no) as the response variable. As the test predictor, we included the 2-way interaction between species (bonobo/chimpanzee) and whether a given male had a living mother at the time of conception (yes/no). As previous research in *Pan* [S1] and other group-living primates [S15] indicates that the number of competing males present at each conception influences the distribution of paternities, we controlled for the number of males present by incorporating the inverse of the number of males log-transformed as an offset term into the model. In order to exclude the possibility that a species difference in the distribution of male ages at reproduction results in a different likelihood of the mother being present, we controlled for the age of all males at conception by including it as a fixed effect. We also included group ID, male ID, offspring ID, and ID of the offspring's mother as random effects. To

keep type 1 error rates at the nominal rate of 0.05 we included random slopes of mother presence within group, mother presence within offspring, and mother presence within mother ID of offspring [S16]. The model was fitted in R (R Core Team 2015) using the lmer function of the R-package lme4 [S17].

We checked for model stability by excluding levels of community, male ID, offspring ID and mother ID of offspring one at a time from the data and comparing the model estimates derived from those data with those for the full dataset. This indicated no influential levels of them to exist (for example, results not driven by a single bonobo male siring all the offspring). Collinearity was not an issue in the model as indicated by variance inflation factors close to 1 estimated from a standard linear model (without random effects; [S18]). The p value for the two-way interaction between species and mother presence at the time of conception is based on likelihood ratio tests comparing the full model with a reduced model without the interaction [S19]. The Null vs. Full model comparison revealed significance ( $\chi^2=10.02$ ,  $df=3$ ,  $p=0.02$ ).

In summary, the full model revealed the following estimates and standard errors: Intercept:  $-1.54\pm 0.5$ ; Mother presence:  $1.55\pm 0.53$  ( $p<0.01$ ); Species:  $0.89\pm 0.45$  ( $p=0.05$ ); Potential sire age  $0.02\pm 0.01$  ( $p=0.02$ ); Mother presence \* Species  $-1.63\pm 0.55$  ( $p<0.01$ ).

### Author Contributions

M.S. analysed the data and together with L.V. and K.L. drafted the manuscript. M.S., K.L., G.H., L.V., C.B., B.F., R.W., K.Z., T.F., M.M., T.S., N.T., S.I., A.P., E.W., K.W., C.C., M.E.T. and Z.M. were involved with study design, interpretation of results or acquisition of data. All authors gave final approval for publication.

### Supplemental References

- S1. Surbeck, M., Langergraber, K.E., Fruth, B., Vigilant, L., and Hohmann, G. (2017). Male reproductive skew is higher in bonobos than chimpanzees. *Curr. Biol.* 27, R640–R641.
- S2. Gerloff, U., Hartung, B., Fruth, B., Hohmann, G., and Tautz, D. (1999). Intracommunity relationships, dispersal pattern and paternity success in a wild living community of Bonobos (*Pan paniscus*) determined from DNA analysis of faecal samples. *Proc. Biol. Sci.* 266, 1189–1195.
- S3. Ishizuka, S., Kawamoto, Y., Sakamaki, T., Tokuyama, N., Toda, K., Okamura, H., and Furuichi, T. (2018). Paternity and kin structure among neighbouring groups in wild bonobos at Wamba. *R. Soc. Open Sci.* 5, 171006.
- S4. Boesch, C., Kohou, G., Nene, H., and Vigilant, L. (2006). Male competition and paternity in wild chimpanzees of the Tai forest. *Am. J. Phys. Anthropol.* 130, 103–115.
- S5. Nakamura, M., Hosaka, K., Itoh, N., and Zamma, K. (2015). *Mahale Chimpanzees: 50 Years of Research*. (Cambridge: Cambridge University Press).
- S6. Inoue, E., Inoue-Murayama, M., Vigilant, L., Takenaka, O., and Nishida, T. (2008). Relatedness in wild chimpanzees: influence of paternity, male philopatry, and demographic factors. *Am. J. Phys. Anthropol.* 137, 256–262.
- S7. Wroblewski, E.E., Murray, C.M., Keele, B.F., Schumacher-Stankey, J.C., Hahn, B.H., and Pusey, A.E. (2009). Male dominance rank and reproductive success in male chimpanzees (*Pan troglodytes schweinfurthii*). *Anim Behav.* 77, 873–885.
- S8. Walker, K.K., Rudicell, R.S., Li, Y., Hahn, B.H., Wroblewski, E., and Pusey, AE. (2017). Chimpanzees breed with genetically dissimilar mates. *R. Soc. Open Sci.* 4, 160422.
- S9. Langergraber, K.E., Watts, D.P., Vigilant, L., and Mitani, J.C. (2017). Group augmentation, collective action, and territorial boundary patrols by male chimpanzees. *Proc. Natl. Acad. Sci. USA* 114, 7337–7342.

- S10. Langergraber, K.E., Rowney, C., Crockford, C., Wittig, R., Zuberbühler, K., and Vigilant, L. (2014). Genetic analyses suggest no immigration of adult females and their offspring into the Sonso community of chimpanzees in the Budongo Forest Reserve, Uganda. *Am. J. Primatol.* 76, 640–648.
- S11. Newton-Fisher, N.E., Thompson, M.E., Reynolds, V., Boesch, C., Vigilant, L. (2010). Paternity and social rank in wild chimpanzees (*Pan troglodytes*) from the Budongo Forest, Uganda. *Am. J. Phys. Anthropol.* 142, 417–428.
- S12. Yerkes, R.M., and Elder, J.H. (1937). Concerning reproduction in the chimpanzee. *Yale J. Biol. Med.* 10, 41–48.
- S13. Drews, B., Harmann, L.M., Beehler, L.L., Bell, B., Drews, R.F., and Hildebrandt, T.B. (2011). Ultrasonographic monitoring of fetal development in unrestrained bonobos (*Pan paniscus*) at the Milwaukee County Zoo. *Zoo Biol.* 30, 241–253.
- S14. Baayen, R.H. (2008). *Analyzing Linguistic Data: A practical introduction to statistics using R*. 1st Edition. (Cambridge: Cambridge University Press).
- S15. Alberts, S.C. (2012). Magnitude and sources of variation in male reproductive performance. In *The evolution of primate societies*, J.C. Mitani, J. Call, P.M. Kappeler, R.A. Palombit, and J.B. Silk, Eds., (Chicago and London: The University of Chicago Press) pp. 412–431.
- S16. Schielzeth, H., and Forstmeier, W. (2009). Conclusions beyond support: overconfident estimates in mixed models. *Behav. Ecol.* 20, 416–420.
- S17. Bates, D., Mächler, M., Bolker, B., and Walker, S. (2015). Fitting linear mixed-effects models using lme4. *J. Stat. Softw.* 67, 1–48.
- S18. Field, A. (2005). *Discovering statistics using SPSS*. (London: Sage Publications).
- S19. Barr, D.J., Levy, R., Scheepers, C., and Tily, H.J. (2013). Random effects structure for confirmatory hypothesis testing: Keep it maximal. *J. Mem. Lang.* 68, 255–278.
